# Supplementary material for: Hydrolysis of ammonia borane for green hydrogen production over a Pd/C3N4 nanocatalyst synthesized by electron beam irradiation
Source: Royal Society of Chemistry journal article supplement (doi:10.1039/d4cy00761a), 2024-01-01
Supplement: d4cy00761a1.pdf [file d4cy00761a1.pdf]

## Supplementary Information

### **Hydrogen Release Mechanism for Hydrolysis of Ammonia Borane over Pd/C<sub>3</sub>N<sub>4</sub> Nanocatalyst Synthesized by Electron Beam Irradiation**

Manish Shingole<sup>1</sup>, Seemita Banerjee\*<sup>1,2</sup>, Priyanka Ruz<sup>2</sup>, Asheesh Kumar<sup>2</sup>, Pratibha Sharma<sup>3</sup>,  
V. Sudarsan<sup>1,2</sup>

<sup>1</sup>Homi Bhabha National Institute, Mumbai India

<sup>2</sup>Chemistry Division, Bhabha Atomic Research Centre, Mumbai, India

<sup>3</sup>Department of Energy Science and Engineering, IIT Bombay, Powai, Mumbai, India

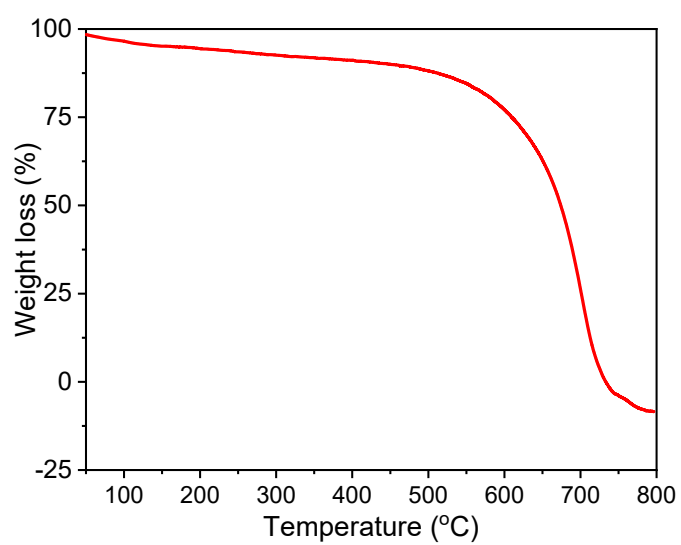

Figure S1: TGA curves of ex-C<sub>3</sub>N<sub>4</sub> in air at a heating rate of 10 K min<sup>-1</sup>, using Setsys Evolution, SETARAM, France

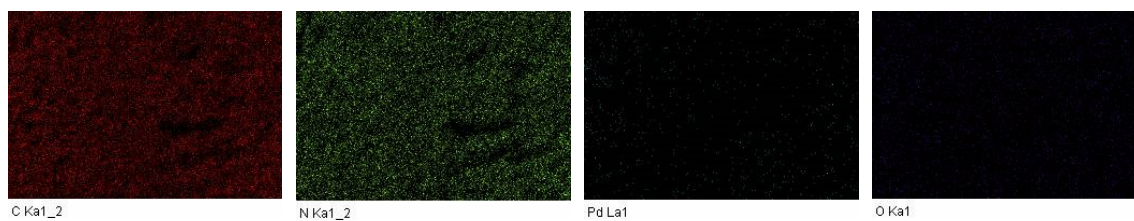

(a)

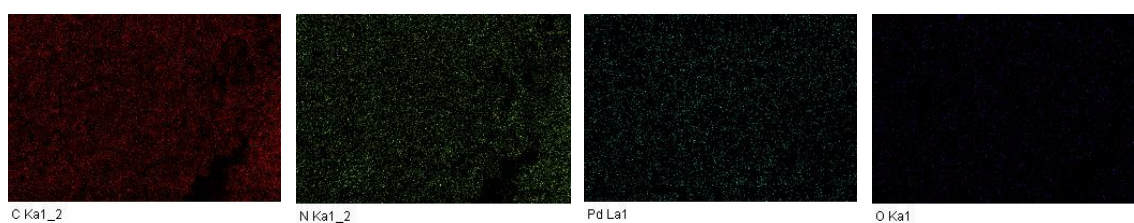

(b)

Figure S2: Elemental mapping of C, N, Pd, and O of (a) CNPd1 and (b) CNPd5

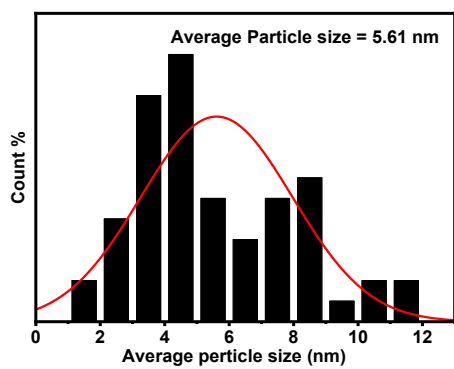

(a)

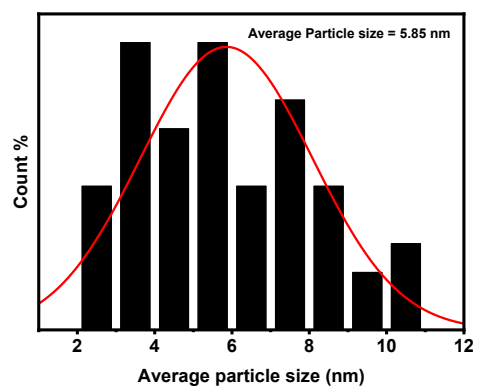

(b)

Figure S3: Particle size distribution of Pd nanoparticles in (a) CNPd1 (b) CNPd5

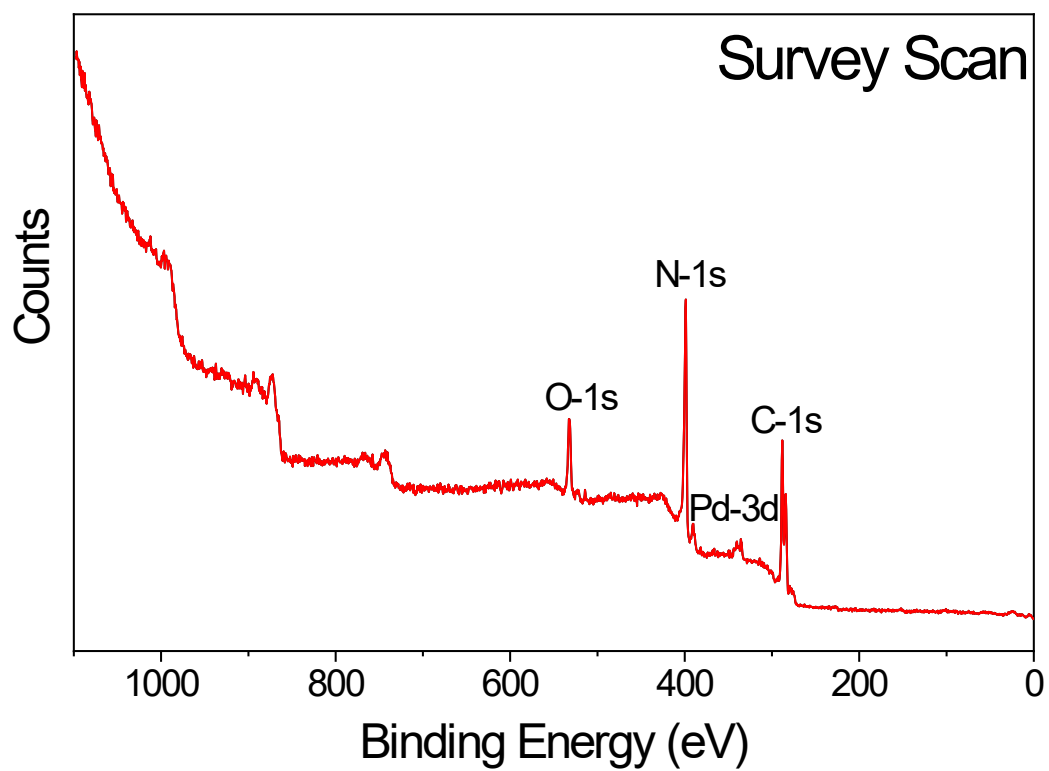

Figure S4: XPS survey scan of CNPd5

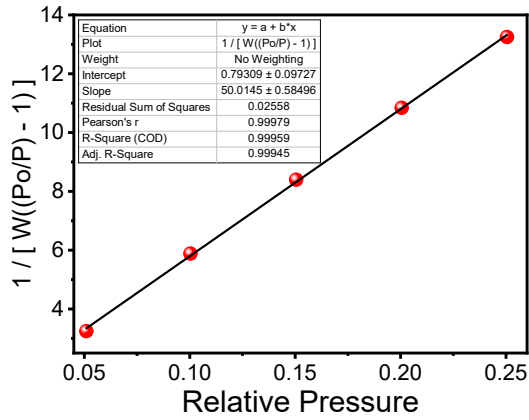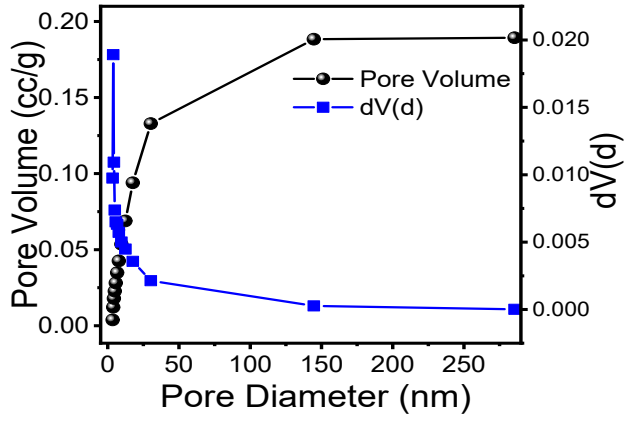

(a)  $C_3N_4$

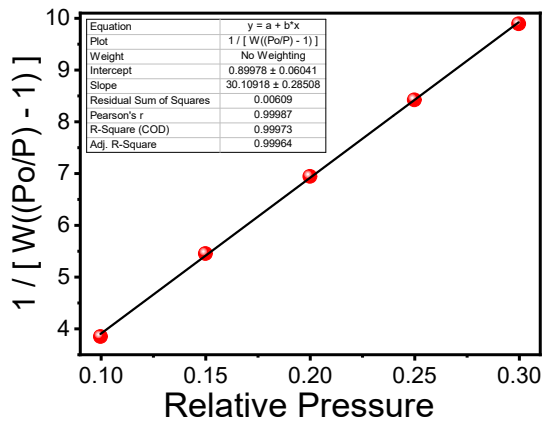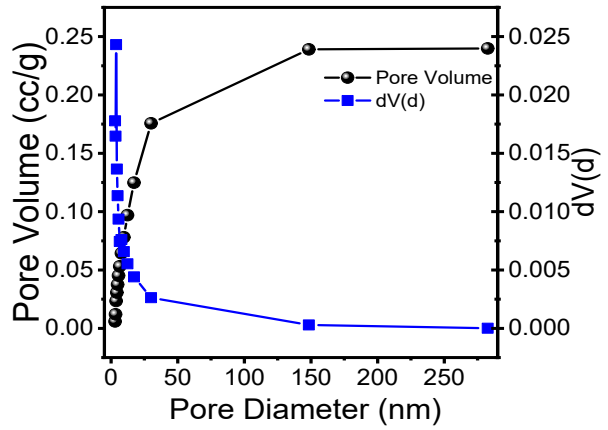

(b) Ex- $C_3N_4$

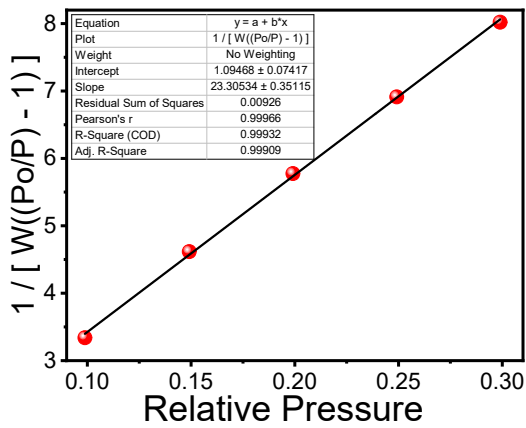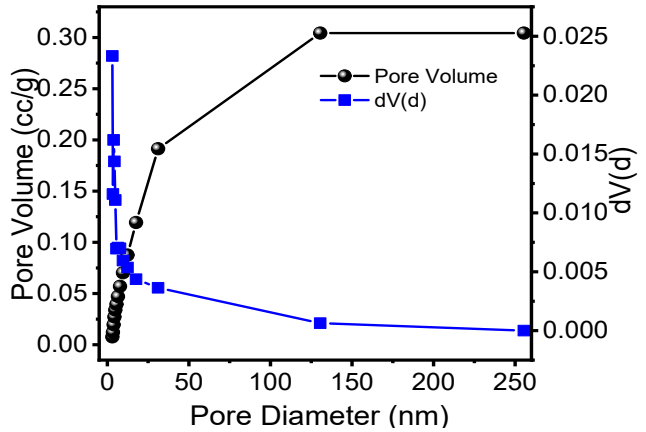

(c) CNPd1

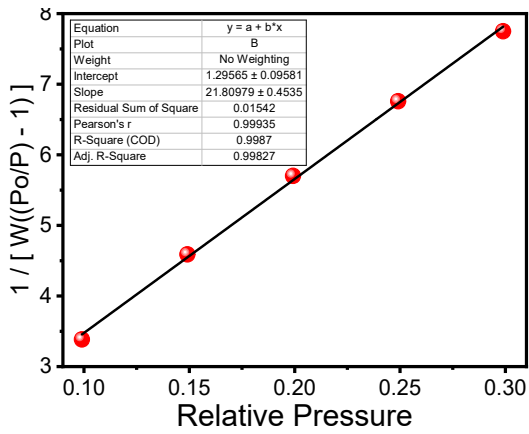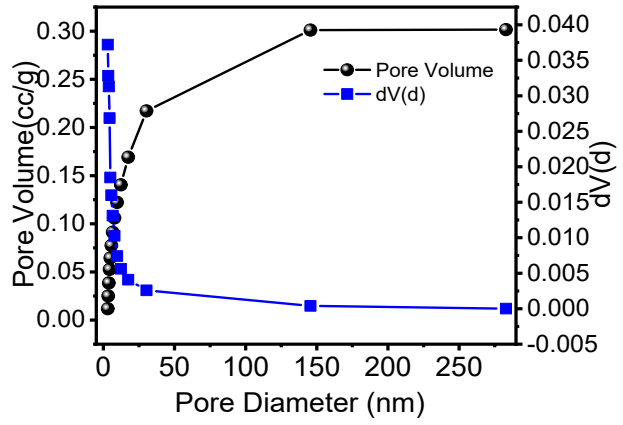

(e) CNPd3

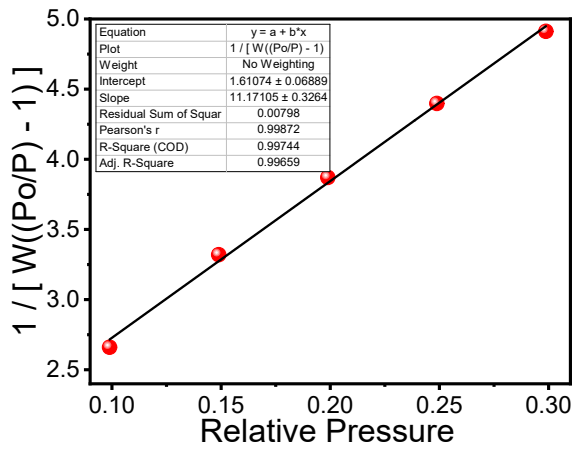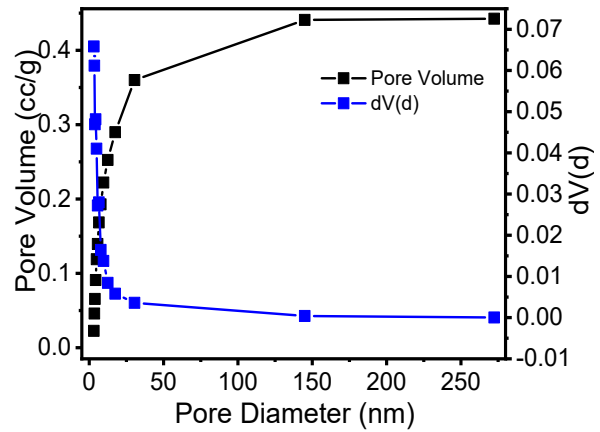

(f) CNPd5

Figure S5 BET plot for surface area analysis and BJH pore size distribution of the samples

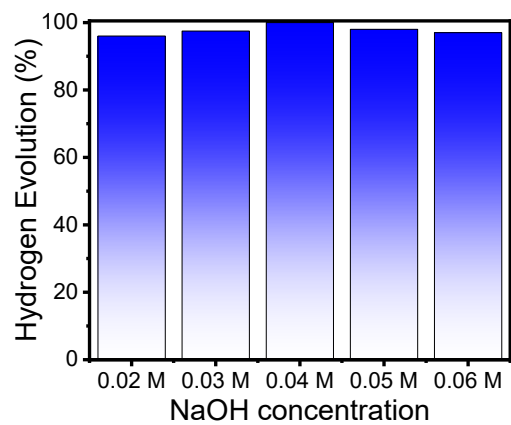

Figure S6 Optimization of the NaOH concentration for the Hydrogen evolution from the CNPd5 catalysed AB hydrolysis



**Table S1:** Activation energy for the ammonia borane hydrolysis reaction in presence of supported Pd catalyst (NA-Not Available)

| Entry | Catalyst                                                | Activation Energy (kJ/mol) | TOF (min <sup>-1</sup> ) | Pd particle size (nm) | References |
|-------|---------------------------------------------------------|----------------------------|--------------------------|-----------------------|------------|
| 1     | Pd/C <sub>3</sub> N <sub>4</sub>                        | 27.36                      | 38.2                     | 5.85                  | This Study |
| 2     | Pd <sup>0</sup> /CeO <sub>2</sub>                       | 68                         | 29                       | 2-6                   | 1          |
| 3     | RGO@Pd                                                  | 38                         | 26.3                     | 5                     | 2          |
| 4     | Pd(0)-HAP                                               | 55                         | NA                       | 3.6                   | 3          |
| 5     | Pd-PVB-TiO <sub>2</sub>                                 | 55.9                       | NA                       | NA                    | 4          |
| 6     | Pd/Co <sub>3</sub> O <sub>4</sub>                       | 62                         | 3048                     | 2.6                   | 5          |
| 7     | Pd/PDA- CoFe <sub>2</sub> O <sub>4</sub>                | 65                         | 175                      | 2.7                   | 6          |
| 8     | Pd/ $\alpha$ -LDH                                       | 20                         | 49.5                     | 5.6                   | 7          |
| 9     | Pd/MCN                                                  | 57                         | 125                      | 2.7                   | 8          |
| 10    | Pd/IPCNs                                                | 29.1                       | 122.8                    | 2.17                  | 9          |
| 11    | Pd/Fe <sub>3</sub> O <sub>4</sub> @SiO <sub>2</sub> -PC | 28.4                       | 47.3                     | 2.3                   | 10         |
| 12    | Pd/CS-rGO                                               | 39                         | 42.5                     | 1.7                   | 11         |
| 13    | Pd/C                                                    | 67.5                       | 40                       | 3.6                   | 12         |
| 14    | Pd(0)/g-C <sub>3</sub> N <sub>4</sub> -CS               | 35.3                       | 25.3                     | 1.4                   | 13         |
| 15    | Pd/CGP-GO-Fe <sub>3</sub> O <sub>4</sub>                | 36.5                       | 16.2                     | NA                    | 14         |
| 16    | Pd/PDA-Fe <sub>3</sub> O <sub>4</sub>                   | 65                         | 14.5                     | 2                     | 15         |
| 17    | RGO-Pd                                                  | 51                         | 6.25                     | 4                     | 16         |
| 18    | CuFe <sub>2</sub> O <sub>4</sub> -NH <sub>2</sub> @Pd   | 38.54                      | NA                       | 3-5                   | 17         |
| 19    | PdCo@NCHP                                               | 36.9                       | 470.5                    | NA                    | 18         |

|    |                     |       |       |           |    |
|----|---------------------|-------|-------|-----------|----|
| 20 | Ni-MoO <sub>x</sub> | NA    | 85.7  | 3         | 19 |
| 21 | CoCu                | 38.6  | 11.56 | 8.6       | 20 |
| 22 | CuNi                | 23.58 | 2.08  | 3.9       | 21 |
| 23 | RuNi                | 27.2  | 905   | 1.40      | 22 |
| 24 | RuCo                | 22.5  | 139   | 1.56-2.94 | 23 |

## References for Supplementary Information

1. Y. Tonbul, S. Akbayrak and S. Özkar, *international journal of hydrogen energy*, 2016, **41**, 11154-11162.
2. B. Kılıç, S. Şencanlı and Ö. Metin, *Journal of Molecular Catalysis A: Chemical*, 2012, **361**, 104-110.
3. M. Rakap and S. Özkar, *international journal of hydrogen energy*, 2011, **36**, 7019-7027.
4. M. Rakap, E. E. Kalu and S. Özkar, *international journal of hydrogen energy*, 2011, **36**, 1448-1455.
5. S. Akbayrak, Z. Özçiğçi and A. Tabak, *Journal of colloid and interface science*, 2019, **546**, 324-332.
6. J. Manna, S. Akbayrak and S. Özkar, *Applied Catalysis B: Environmental*, 2017, **208**, 104-115.
7. Y. H. Zhou, S. Wang, Z. Zhang, N. Williams, Y. Cheng and J. Gu, *ChemCatChem*, 2018, **10**, 3206-3213.
8. W. Wang, Z. H. Lu, Y. Luo, A. Zou, Q. Yao and X. Chen, *ChemCatChem*, 2018, **10**, 1620-1626.
9. M. Mao, Q. Chen, J. Wu and G. Fan, *International Journal of Hydrogen Energy*, 2020, **45**, 27244-27253.
10. S. Liu, Y.-T. Li, X.-C. Zheng, X.-X. Guan, X.-L. Zhang and P. Liu, *International Journal of Hydrogen Energy*, 2020, **45**, 1671-1680.
11. S. Liu, X. Chen, Z.-J. Wu, X.-C. Zheng, Z.-K. Peng and P. Liu, *International Journal of Hydrogen Energy*, 2019, **44**, 23610-23619.
12. S. Akbayrak and S. Özkar, *Journal of Colloid and Interface Science*, 2022, **626**, 752-758.
13. H. Jia, X. Chen, X. Song, X. Zheng, X. Guan and P. Liu, *International Journal of Energy Research*, 2019, **43**, 535-543.
14. H. Jia, S. Liu, G.-P. Zheng, X.-C. Zheng, X.-Y. Wang and P. Liu, *International Journal of Hydrogen Energy*, 2019, **44**, 27022-27029.
15. J. Manna, S. Akbayrak and S. Özkar, *RSC advances*, 2016, **6**, 102035-102042.
16. P. Xi, F. Chen, G. Xie, C. Ma, H. Liu, C. Shao, J. Wang, Z. Xu, X. Xu and Z. Zeng, *Nanoscale*, 2012, **4**, 5597-5601.
17. J. Ma, X. Guo and X. Ji, *International Journal of Hydrogen Energy*, 2024, **51**, 345-356.
18. J. Deng, X. Zhou, J. Zou, Y. Qin and P. Wang, *ACS Applied Energy Materials*, 2022, **5**, 7408-7419.
19. W. Liu, L. Yao, X. Sun, W. Wang, G. Feng, Q. Yao, L. Zhang and Z. H. Lu, *ChemSusChem*, 2024, **17**, e202400415.
20. J. Liu, B. Li, Y. Dong, Q. Liu, Y. Song, Y. Guo, Y. Zhao, X. Li and J. Xiong, *Catalysis Letters*, 2024, **154**, 461-472.
21. R. Jiang, M. Yang, J. Meng, P. Zhao, P. Liu and X. Zheng, *International Journal of Hydrogen Energy*, 2023, **48**, 18245-18256.
22. Y. Li, Q. Liu, J. Meng, Y. Yang, Z. Peng and X. Zheng, *Applied Surface Science*, 2022, **605**, 154709.
23. Y. He, Z. Wang, M. Mao, Q. Li and G. Fan, *New Journal of Chemistry*, 2021, **45**, 14759-14764.
